# Supplementary material for: A Novel Model for the RNase MRP-Induced Switch between the Formation of Different Forms of 5.8S rRNA
Source: MDPI journal article supplement (doi:10.3390/ijms22136690), 2021-06-22
Supplement: s1 [file s1]

## Supplementary Materials

| Table S1. Long 5.8S rRNA normalized to total 5.8S (long+short). Average of 25° and 37° samples |                   |       |    |                       |       |   |                         |       |   |                                        |       |    |
|------------------------------------------------------------------------------------------------|-------------------|-------|----|-----------------------|-------|---|-------------------------|-------|---|----------------------------------------|-------|----|
| ITS1 mutant                                                                                    | <i>Δrpa12 Δxm</i> |       |    | YLL53 ( <i>RRP2</i> ) |       |   | YLL54 ( <i>rrp2-2</i> ) |       |   | Average of <i>Δrpa12Δxm1</i> and YLL53 |       |    |
|                                                                                                | Ave               | STD   | n  | Ave                   | STD   | n | Ave                     | STD   | n | Ave                                    | STD   | n  |
| wt                                                                                             | 0,21              | 0,044 | 10 | 0,20                  | 0,034 | 8 | 0,59                    | 0,042 | 8 | 0,21                                   | 0,039 | 18 |
| Δ13                                                                                            | 0,19              | 0,015 | 2  | 0,21                  | 0,045 | 2 | 0,76                    | 0,034 | 2 | 0,20                                   | 0,030 | 4  |
| Δ14                                                                                            | 0,31              | 0,025 | 2  | 0,34                  | 0,036 | 2 | 0,80                    | 0,026 | 2 | 0,33                                   | 0,033 | 4  |
| Δ15                                                                                            | 0,26              | 0,026 | 2  | 0,40                  | 0,015 | 4 | 0,60                    | 0,093 | 6 | 0,34                                   | 0,085 | 6  |
| Δ16                                                                                            | 0,22              | 0,000 | 2  | 0,34                  | 0,036 | 2 | 0,80                    | 0,026 | 2 | 0,18                                   | 0,045 | 4  |
| Δ17                                                                                            | 0,61              | 0,002 | 2  | 0,34                  | 0,036 | 2 | 0,80                    | 0,026 | 2 | 0,75                                   | 0,157 | 4  |
| Δ18                                                                                            | 0,50              | 0,122 | 2  | 0,34                  | 0,036 | 2 | 0,80                    | 0,026 | 2 | 0,65                                   | 0,185 | 4  |
| Δ19                                                                                            | 0,56              | 0,030 | 2  | 0,64                  | --    | 1 | 0,81                    | 0,044 | 2 | 0,61                                   | 0,050 | 3  |
| Δ2                                                                                             | 0,74              | 0,007 | 4  | 0,82                  | 0,028 | 2 | 0,89                    | 0,002 | 2 | 0,77                                   | 0,042 | 6  |

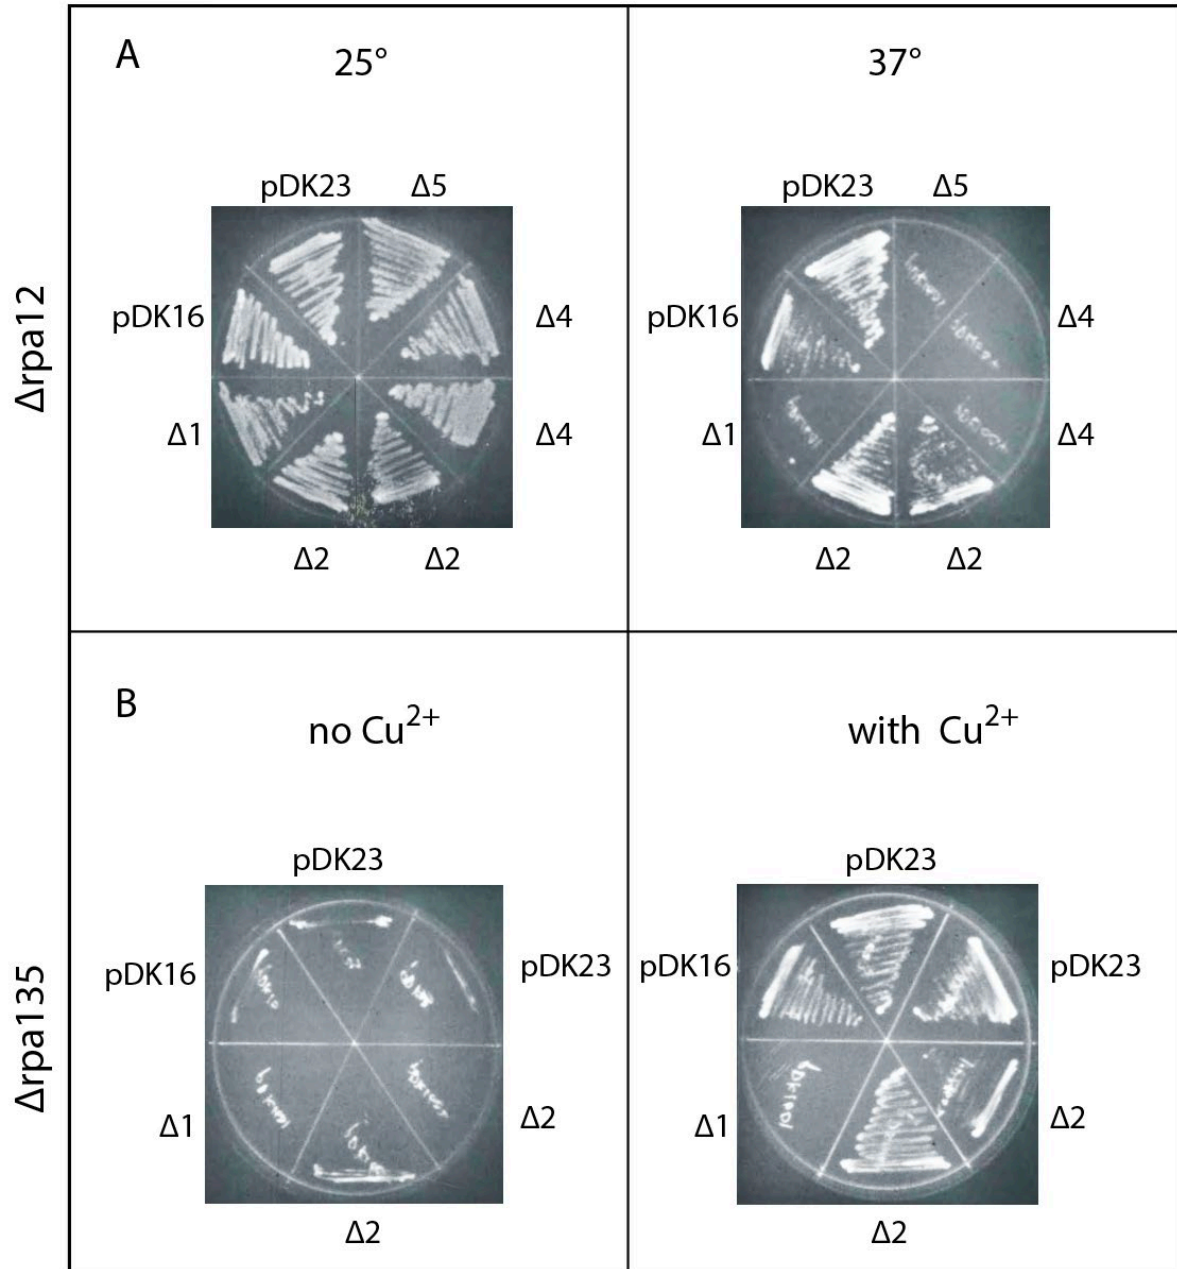

**Figure S1.** Test of ITS1 deletions for support of growth. pDK16 and derivatives with deletions inside ITS1 were transformed into  $\Delta rpa135$  and  $\Delta rpa12$  selecting for tryptophan prototrophy. **(A)**  $\Delta rpa12$  transformants were streaked on synthetic glucose medium with Cu<sup>2+</sup> and incubated at 25° and 37°. pDK16 and pDK16 $\Delta$ 2 are described in the text. pDK23 contains a 7 basepair deletion in the A3 site [35].  $\Delta$ 1 is missing the entire 5.8S, ITS2 and the first 318 nucleotides of 25S.  $\Delta$ 5 is a combination of  $\Delta$ 2 and  $\Delta$ 4. **(B)**  $\Delta rpa135$  transformants were streaked on synthetic glucose plates (repressing expression of rRNA from the resident Pgal-rRNA plasmid) with and without Cu<sup>2+</sup> and incubated at 30°.

Host:  $\Delta rpa12 \Delta xrn1$

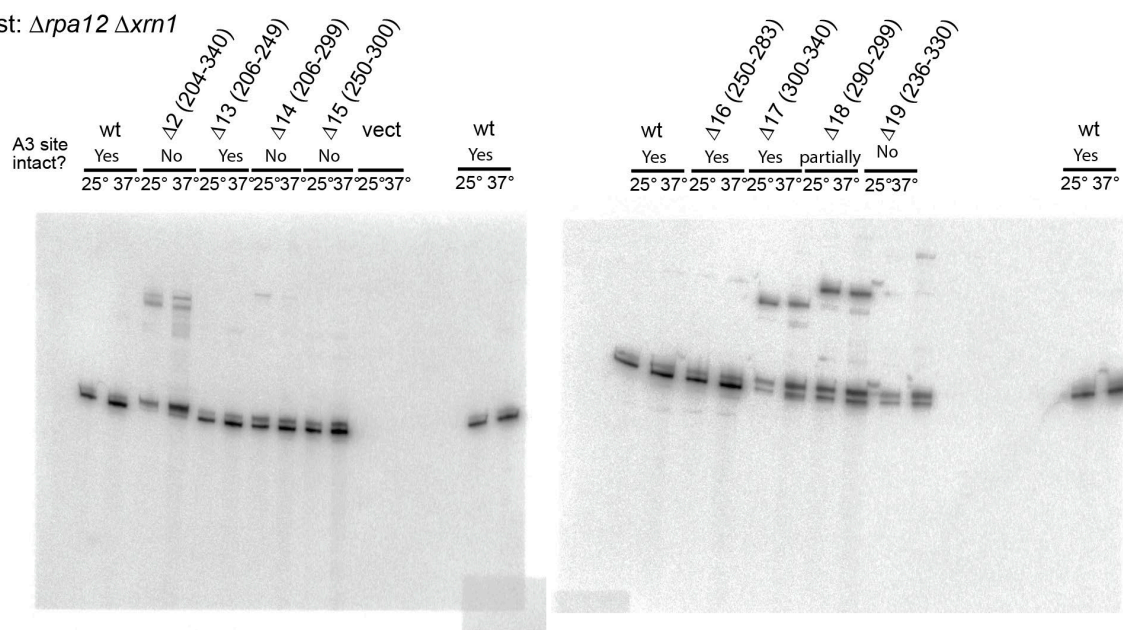

**Figure S2.** Uncropped autoradiograms used for Figure 3 top row.

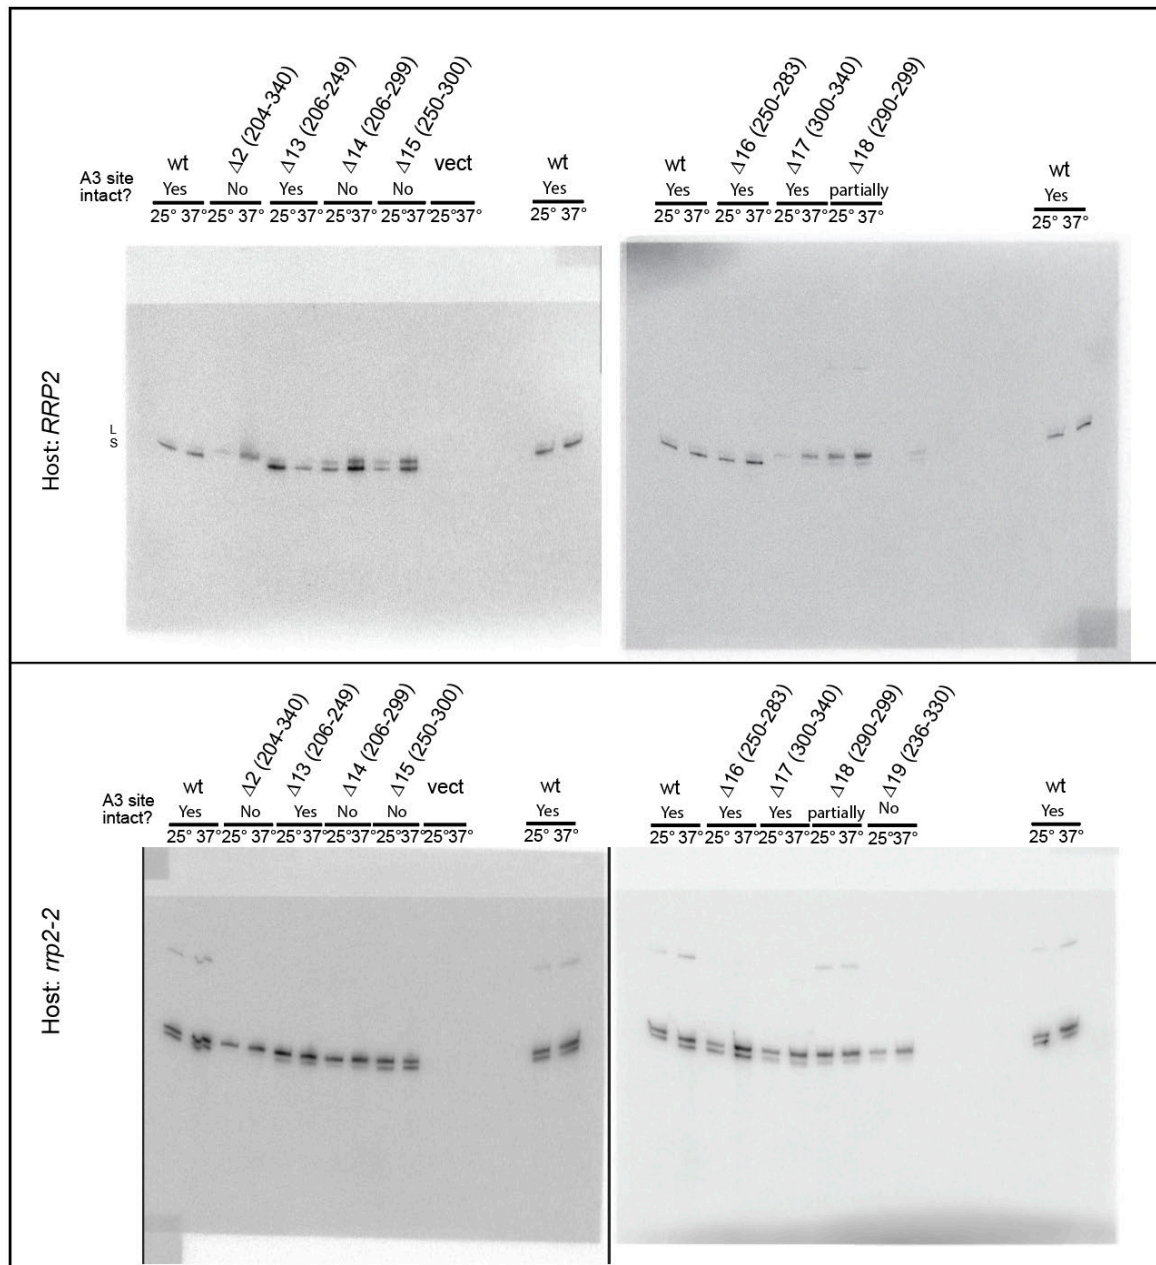

**Figure S3.** Uncropped autoradiograms used for Figure 3 middle and bottom rows.

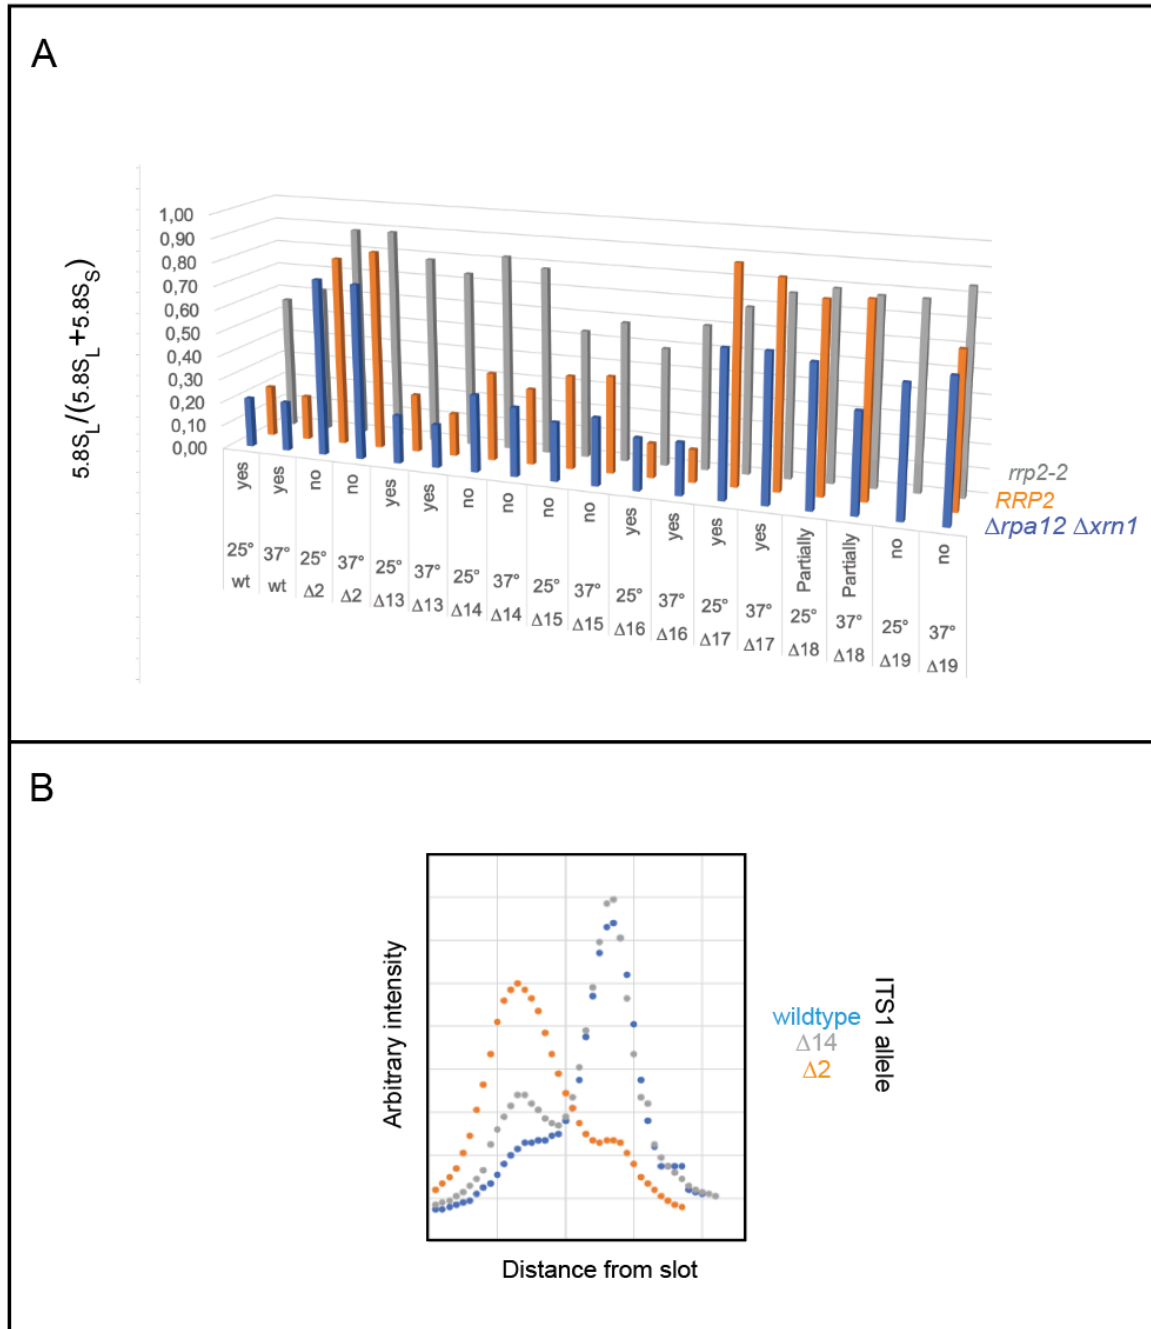

**Figure S4.** Quantification of long and short 5.8S rRNA in strains carrying pDK16 or its ITS1 deletion derivatives. Cultures of *Δrpa12 Δxrn1* and *RRP2* (YLL53) and its *rrp2-2* isogenic sibling (YLL54) harboring pDK16, or one of its ITS1 deletion derivatives, were grown at 25° and shifted to 37° for 6 hours. Total RNA was extracted from samples of the culture before and after the shift and used for acrylamide gel electrophoresis followed by northern blot analysis using O576 probe (Figure 3 in main text). The bands were quantified using Adobe Photoshop and the fraction of total 5.8S rRNA constituted by 5.8S<sub>L</sub> (L-fraction) was calculated for each sample. The results were graphed using Microsoft Excel (panel A). Examples of the resolution of lanes with RNA from wildtype (low 5.8S<sub>L</sub>), Δ14 (medium 5.8S<sub>L</sub>), and Δ2 in *Δrpa12 Δxrn1* are shown in panel B. Since there is little difference in the L-fraction for samples harvested before and after the temperature shift, the results from the 25° and 37° samples from a given condition were averaged and results are shown in Figure 5A.

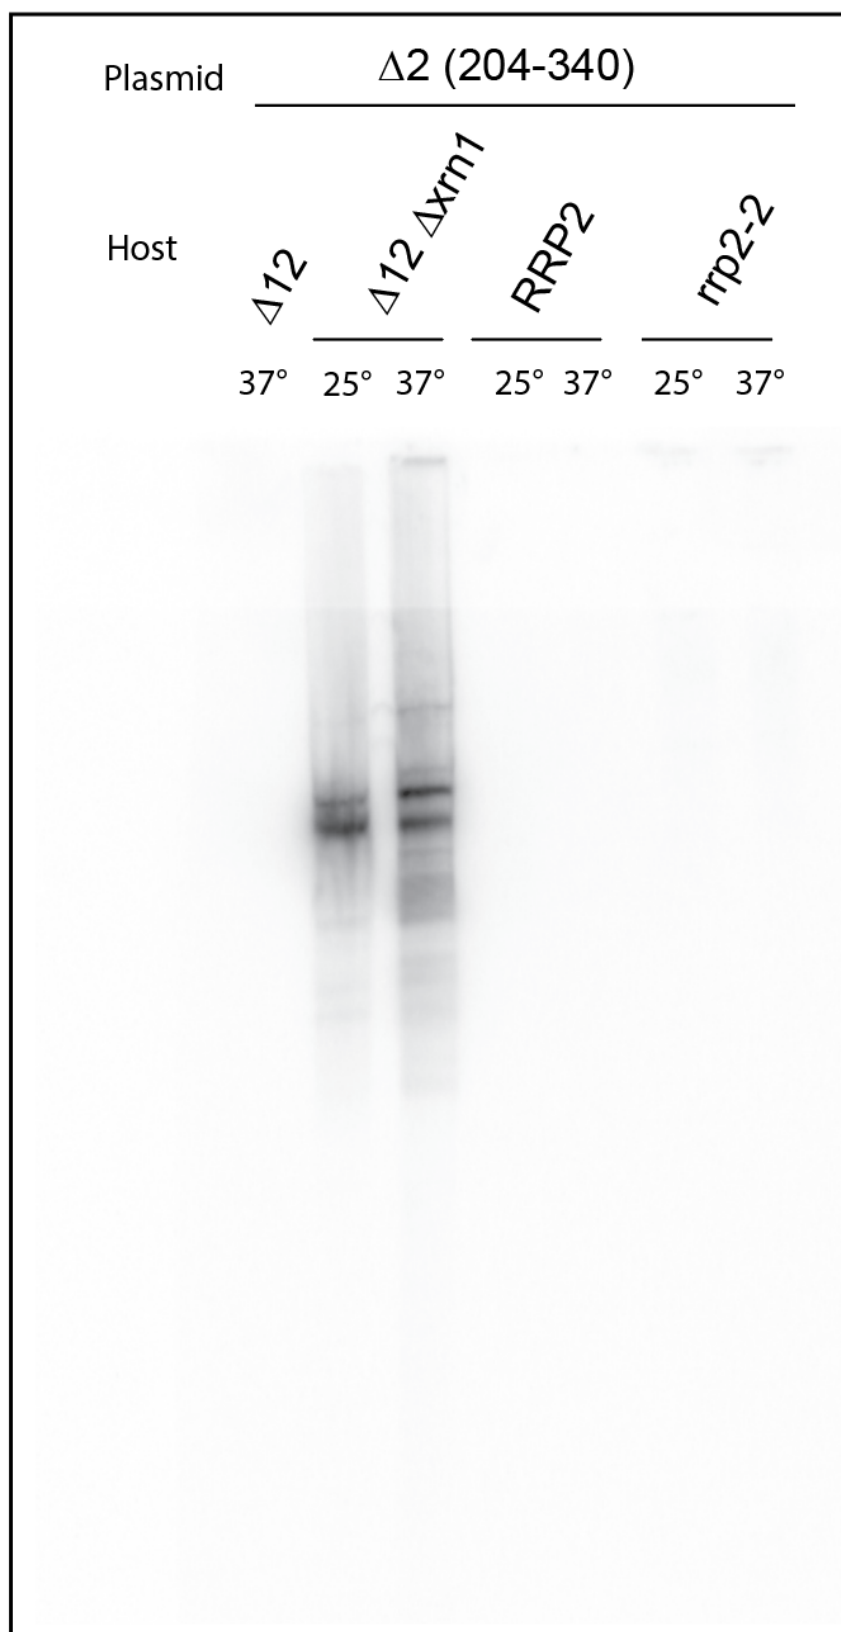

**Figure S5.** Uncropped northern blot of RNA from  $\Delta rpa12$ ,  $\Delta rpa12 \Delta xrn1$ , RRP2, and  $rrp2-2$ , all carrying pDK16 $\Delta 2$  probed with O552 spanning the  $\Delta 2$  deletion and revealing RNA transcripts containing the  $\Delta 2$  deletion (see text).

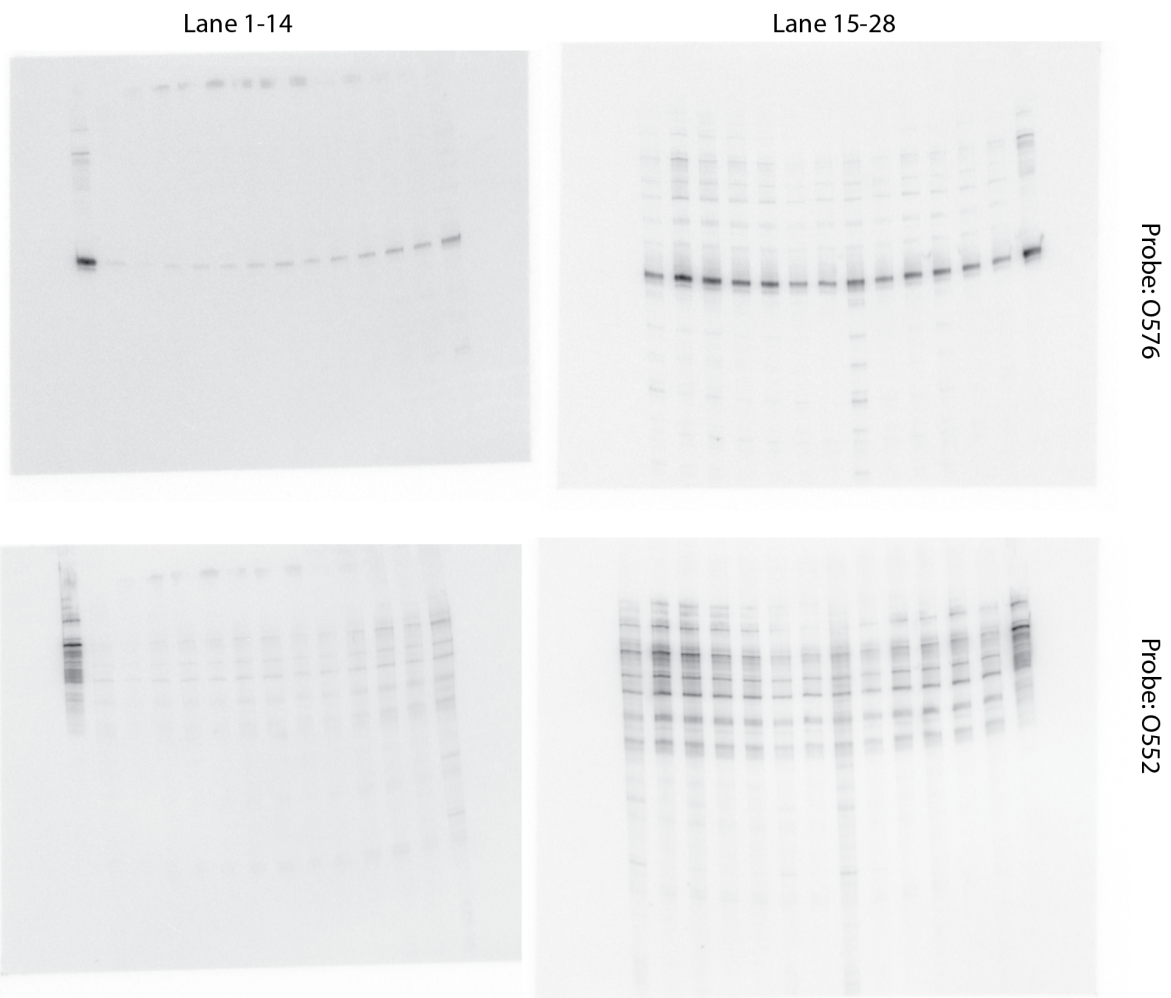

**Figure S6.** Uncropped northern blots used for Figure 8.
